Development 137, 395–403 (2010) doi:10.1242/dev.038828  
 © 2010. Published by The Company of Biologists Ltd

# Gata3 regulates trophoblast development downstream of Tead4 and in parallel to Cdx2

Amy Ralston<sup>1,2</sup>, Brian J. Cox<sup>1</sup>, Noriyuki Nishioka<sup>3</sup>, Hiroshi Sasaki<sup>3</sup>, Evelyn Chea<sup>1</sup>, Peter Rugg-Gunn<sup>1</sup>, Guoji Guo<sup>4,5</sup>, Paul Robson<sup>4,5</sup>, Jonathan S. Draper<sup>6,\*</sup> and Janet Rossant<sup>1,\*</sup>

## SUMMARY

The mouse blastocyst and stem cells derived from its tissue lineages provide a unique genetic system for examining the establishment and loss of pluripotency. The transcription factor *Cdx2* plays a central role by repressing pluripotency genes, such as *Oct4*, and promoting extraembryonic trophoblast fate at the blastocyst stage. However, genetic evidence has suggested that *Cdx2* does not work alone in the trophoblast lineage. We have used bioinformatic and functional genomic strategies to identify the transcription factor *Gata3* as a trophoblast factor. We show *Gata3* to be capable of inducing trophoblast fate in embryonic stem cells and driving trophoblast differentiation in trophoblast stem cells. In addition, *Cdx2* is not required for *Gata3*-induced expression of a subset of trophoblast genes in embryonic stem cells. We show that *Gata3* is coexpressed with *Cdx2* in the blastocyst, but this does not depend on *Cdx2*. In the embryo, expression of *Gata3*, like that of *Cdx2*, depends on *Tead4*, and the expression of both factors becomes restricted to trophoblast by a mechanism that does not initially rely on *Oct4*. These observations suggest that *Gata3* and *Cdx2* can act in parallel pathways downstream of *Tead4* to induce the expression of common and independent targets in the trophoblast lineage, whereas *Oct4* is required for continued repression of trophoblast fate in the embryonic lineage.

**KEY WORDS:** Trophectoderm, Placenta, Implantation, Pluripotency, Lineage restriction, Embryogenesis, Mouse

## INTRODUCTION

The first developmental decisions during mouse development lead to the establishment of the embryonic and extraembryonic tissue lineages. Stem cell lines have been isolated from these early lineages, including embryonic stem (ES) and trophoblast stem (TS) cells (Evans and Kaufman, 1981; Martin, 1981; Tanaka et al., 1998). Both stem cell types are self-renewing and capable of lineage-appropriate differentiation. For example, ES cells can differentiate into a wide range of fetal cell types, but fail to form trophoblast (Beddington and Robertson, 1989). Conversely, TS cells differentiate along the trophoblast/placenta lineage, and fail to form fetal cell types (Tanaka et al., 1998). To create a placenta, the trophoblast lineage must achieve several distinct goals simultaneously at the blastocyst stage. Trophoblast cells must override the pluripotency program of the embryonic lineage, they must establish the ability to self-renew, and they must maintain the ability to differentiate into mature trophoblast cell types. *Cdx2* and *Eomes* are required for trophoblast survival and maturation starting around the blastocyst stage (Russ et al., 2000; Strumpf et al., 2005). These genes are also important for TS cell establishment (Strumpf et al., 2005), suggesting roles in proliferation. However, not all cells of the trophectoderm are proliferative, as some trophectoderm cells

visibly differentiate as early as implantation. This suggests that programs that promote proliferation and differentiation might coexist at the blastocyst stage.

Besides *Cdx2* and *Eomes*, genetic evidence suggests that other genes participate in trophoblast formation in the blastocyst. For example, loss of *Tead4*, which is required for expression of *Cdx2* in the trophectoderm (Yagi et al., 2007; Nishioka et al., 2008), leads to a more severe phenotype than loss of *Cdx2*. Thus, *Tead4* must have multiple trophoblast targets acting at the blastocyst stage to regulate trophoblast development. Consistent with this proposal, constitutively active *Tead4* is sufficient to induce trophoblast formation even in the absence of *Cdx2* in ES cells (Nishioka et al., 2009). Other factors capable of overriding the pluripotency pathway and promoting trophoblast fate must therefore exist.

To identify new factors involved in early lineage decisions in the mouse, we used a bioinformatic strategy to compare expression profiles of stem cells from the blastocyst. Transcripts encoding the transcription factor *Gata3* were specifically enriched in TS cells and in the trophoblast lineage, consistent with recent reports (Home et al., 2009; Ray et al., 2009). Although *Gata3* expression is restricted to the trophectoderm at the blastocyst stage, we found that this expression does not depend on *Cdx2*. Rather, expression of *Gata3*, like that of *Cdx2*, depends on *Tead4*. We show that *Oct4* (*Pou5f1*) is not initially involved in restricting expression of either *Cdx2* or *Gata3* to the trophectoderm, but *Oct4* maintains repression of these genes in the epiblast. In ES cells, *Gata3* is capable of overriding pluripotency and directing the expression of a multitude of *Cdx2*-independent trophoblast genes, whereas in TS cells *Gata3* promotes differentiation.

## MATERIALS AND METHODS

### Bioinformatic analysis

For comparison of ES, TS and XEN cell expression profiles, MGU74v2A microarray.CEL files for ES (GSE3766), XEN (GSE2204) and TS (GSE3766) cells were downloaded from the GEO website

<sup>1</sup>Program in Developmental and Stem Cell Biology, Hospital for Sick Children Research Institute, MARS Building, Toronto Medical Discovery Tower, 101 College St, Toronto, ON M5G 1L7, Canada. <sup>2</sup>Department of Molecular, Cell, and Developmental Biology, University of California, Santa Cruz, CA 95064, USA. <sup>3</sup>Laboratory for Embryonic Induction, RIKEN Center for Developmental Biology, 2-2-3 Minatogijima-minamimachi, Chuo-ku, Kobe, Hyogo 650-0047, Japan. <sup>4</sup>Department of Biological Sciences, National University of Singapore, Singapore 117543. <sup>5</sup>Stem Cell and Developmental Biology, Genome Institute of Singapore, 138672 Singapore. <sup>6</sup>McMaster Stem Cell and Cancer Research Institute, 1200 Main Street West, MDCL 5032, Hamilton, ON L8N 3Z5, Canada.

\*Authors for correspondence (draperj@mcmaster.ca; janet.rossant@sickkids.ca)

(<http://www.ncbi.nlm.nih.gov/projects/geo/>) and processed using GCOS software (Affymetrix) with the 'statistical method' algorithm to generate signal intensities and absent/present calls. Log<sub>2</sub> ratios and fold-change calls for probe sets in TS and XEN cell samples versus ES cells were determined. Probe sets with more than a 2-fold difference in expression in TS cells ( $P < 0.003$ ) versus ES cells and with GO annotation as a transcription factor (GO term ID: 000635) were selected for hierarchical clustering. GO annotation was obtained from the Affymetrix annotation file for the gene chip. Hierarchical clustering was performed with Cluster 3.0 (de Hoon et al., 2004) using the 'uncentered correlation similarity' metric with average linkage, and resulting clusters were visualized with Java TreeView.

For comparison of *Gata3* and *Cdx2* activity in wild-type and *Cdx2* null cells, Affymetrix MOE430 2.0 microarrays were performed on four independent *Gata3*-expressing lines, two *Cdx2*-expressing lines, and three *Gata3*-expressing *Cdx2* null lines. Data for these and TS cells were batch processed using Expression Console software (Affymetrix) to normalize arrays. Probe intensities were calculated using the PLIER algorithm. To reduce sample complexity, redundant probes matching to a single gene were filtered for a representative probe that had the largest number of signals greater than three times the global median signal across all samples. Ratios of gene expression for *Gata3*-expressing and *Cdx2*-expressing cells were calculated relative to tamoxifen-treated R1 cells and were log<sub>2</sub> transformed. Ratios for *Gata3*-expressing *Cdx2* null cells were calculated relative to tamoxifen-treated *Cdx2* null cells. Expression ratios for TS cells and their differentiated samples were calculated relative to the median expression level of the probe set across all the TS samples. To facilitate mining of the data set, all expression and probe set annotation was placed into a custom database using MySQL and queried using command line scripts. Raw data are available at GEO with accession numbers GSE12985 and GSE12986.

#### Cell culture

The ES cell lines R1 and dKO23-5 (Niwa et al., 2005) were maintained on gelatin using standard culture conditions. To create stably transformed lines,  $1-3 \times 10^7$  ES cells were electroporated with 20-30  $\mu$ g plasmid (pCAG-hCdx2ERT2-ires-puro<sup>r</sup>, or pCAG-hGata3ERT2-ires-puro<sup>r</sup>), and were then seeded on two 10-cm gelatinized plates. Cells were fed with medium to select for expression of the plasmid (ES medium + 1.2  $\mu$ g/ml puromycin) and individual colonies expanded. To induce transgene activity, cells were treated with induction medium [TS medium + 1  $\mu$ g/ml tamoxifen (Sigma)]. For microarray analysis,  $2 \times 10^5$  cells were seeded on gelatinized 35-mm wells in ES medium, and then switched to TS cell medium with tamoxifen the following day, and fed daily for 6 days. To derive TS-like cell lines, cells were treated with tamoxifen on mouse embryonic feeder layers for 6 days in TS cell medium, and then passaged onto fresh feeders in TS cell medium.

TS cell lines included TS3.5 and TS6.5, which were isolated from blastocyst and E6.5 embryos, respectively, and were maintained or differentiated as described (Tanaka et al., 1998), and TS<sub>WT</sub>, which was isolated from ICR blastocysts. For overexpression of *Gata3*, TS<sub>WT</sub> cells were electroporated with *Gata3*ER, followed by selection for plasmid expression (with 1.2  $\mu$ g/ml puromycin in TS cell medium) and tamoxifen treatment (1  $\mu$ g/ml) for 5 days.

#### Gene expression analysis

RNA was harvested from plated cells using Trizol (Invitrogen). For real-time PCR analysis, cDNA was synthesized using the Quantitect Kit (Qiagen). Real-time PCR analyses were performed using SYBR Green and a LightCycler 480 (Roche). All reactions (12  $\mu$ l) were performed in triplicate, with 100-200 ng cDNA and 300 nM primers (shown 5' to 3') per reaction: *Hprt1*, AAACAATGCAAACCTTTGCTTCC and GGTCCTTTTACCAGCAAGCT; *Gata3*, GGGTTCGGATGTAAGTCGAG and CCACAGTGGGTTAGAGTTG; *Cdx2*, AGACAAATACGGGGTGGTGTA and CCAGCTCACTTTTCTCCTGA; *Pr12c2*, AGCCCCATGAGATGCAATAC and CATCCAAAATCATGGCTCCT; *Bmp4*, AGGAGGAGGAAGAGCAG and ACTGGTCCCTGGGATGTTCT; *Pdgfra*, ACGTTCAAGACCAGCGAGTT and CGATCGTTTCTCCTGCCTTA; *Ascl2*, TTTTCGAGGACGCAATAAGC and CACTGCTGCAGGACTCCCTA; *Eomes*, GTGACAGAGACGGTGTGGAGG and AGAGGAGGCCGTTGGTCTGTGG; *Elf5*, TGCCTTTGAGCATCA-

GACAG and TACTGGTCCGAGCAGAATTG; *Tead4*, ACGGAGGAAGGCAAGATGTA and CTGGAGACCTGCTTCCTTGT. A standard primer efficiency curve for each primer pair was generated using TS3.5 cDNA. Levels of *Hprt1* served as an internal reference for all reactions. Amplification of a single PCR product for each reaction was confirmed by melting curve analysis, and all primers spanned exon junctions. RNA samples used for microarray hybridization were collected using Trizol, and then further purified using the RNeasy Mini Kit (Qiagen). Samples were analyzed by Affymetrix mouse MOE 430 2.0 cDNA microarrays (The Center for Applied Genomics, Toronto, Canada).

For single-blastocyst qPCR, total RNA was extracted from individual blastocysts using the PicoPure RNA Isolation Kit (Arcturus Bioscience), and cDNA synthesized at 37°C for 2 hours using the high-capacity cDNA Archive Kit (Applied Biosystems). One eighth of each cDNA preparation was preamplified for 16 cycles (95°C for 15 seconds and 60°C for 4 minutes) using the TaqMan PreAmp Master Mix Kit (Applied Biosystems) and gene-specific primers. Products were then diluted 5-fold for PCR (Applied Biosystems) in 48.48 Dynamic Arrays on a BioMark System (Fluidigm). Threshold cycle (Ct) values were calculated using the system's software (BioMark Real-time PCR Analysis) and were normalized to *Actb* Ct values.

#### Immunofluorescence and in situ hybridization

Preimplantation embryos were harvested, stained and examined by confocal microscopy as described previously (Ralston and Rossant, 2008). Primary antibodies included mouse anti-Cdx2 (1:200, Biogenex CDX2-88), rabbit anti-Cdx2 (1:200) (Chawengsaksothak et al., 1997), mouse anti-Gata3 (1:20, Santa Cruz H-48) and mouse anti-Oct4 (1:10, Santa Cruz C-10). Secondary antibodies included Alexa488- or Alexa546-conjugated goat anti-mouse, rabbit or rat IgG (Molecular Probes) and Cy3-conjugated anti-mouse, rabbit or rat IgG (Jackson). Secondary antibody-only controls were performed in parallel (not shown). Whole-mount embryo in situ hybridization was performed as described (Yamanaka et al., 2007).

#### Mouse strains

Mouse strains used in this study included wild-type (ICR) mice and mice heterozygous for null alleles of *Cdx2* (*Cdx2*<sup>tm1Fbe</sup>) (Chawengsaksothak et al., 1997), *Oct4* (*Pou5f1*<sup>tm1Scho</sup>) (Kehler et al., 2004) and *Tead4* (*Tead4*<sup>tm1Hssk</sup>) (Nishioka et al., 2008). All mice were treated in accordance with institutional guidelines. For genotyping, blastocysts were individually recovered following confocal microscopy and lysed using the Extract-N-Amp Tissue PCR Kit (Sigma) in a total of 10  $\mu$ l per embryo, of which 2  $\mu$ l was used for 10  $\mu$ l PCR genotyping reactions, with 5  $\mu$ l PCR Red mix and 0.5  $\mu$ l each 10  $\mu$ M primer (Kehler et al., 2004; Strumpf et al., 2005; Nishioka et al., 2008).

## RESULTS

### *Gata3* is enriched in trophoblast stem cells

To identify potential trophoblast-inducing factors, we compared microarray expression profiles of stem cells derived from the blastocyst lineages: ES, TS and extraembryonic endoderm stem (XEN) cells (Kunath et al., 2005) (see Materials and methods). Probe sets that were significantly increased in TS and XEN cells relative to ES cells ( $P < 0.003$ ) were retained, and analysis of corresponding gene ontology (GO) terms yielded 122 transcription factors specifically enriched in TS cells (see Fig. S1 in the supplementary material), as represented by 138 probe sets. Importantly, this list included genes known to be essential for early trophoblast development, such as *Cdx2* (Strumpf et al., 2005), *Eomes* (Russ et al., 2000; Strumpf et al., 2005) and *Tead4* (Yagi et al., 2007; Nishioka et al., 2008). We therefore reasoned that other transcription factors enriched in this list could likewise be important for trophoblast development.

We focused on the zinc-finger transcription factor *Gata3*, the expression of which was specifically highly enriched in TS cells. Consistent with the microarray data, quantitative RT-PCR (qPCR)

analysis of *Gata3* levels indicated a greater than 100-fold enrichment of *Gata3* in TS cells compared with ES cells (Fig. 1A). *Gata3* is known to be expressed in, and required for the function of, the trophoblast lineage at later stages of development of the placenta (Ma et al., 1997). However, its high level of expression in TS cells suggested a previously unrecognized role for *Gata3* in regulating stem cells of the trophoblast lineage. Examination of differentiating TS cells revealed that *Gata3* levels increase during TS cell differentiation (Fig. 1B). These observations suggested that *Gata3* might promote TS cell differentiation, consistent with its requirement in directing the formation of giant cells in the placenta (Ma et al., 1997).

### Global comparison of *Gata3* and *Cdx2* trophoblast-inducing activity

ES cells are normally restricted in developmental potential to embryonic fates, having lost or suppressed the ability to generate trophoblast cell types (Beddington and Robertson, 1989). Overexpression of key trophoblast factors has been shown to lead to an increase in trophoblast gene expression in ES cells within a 6-day time frame (Niwa et al., 2005; Lu et al., 2008; Ng et al., 2008; Nishioka et al., 2009; Nishiyama et al., 2009). Subsequent passage of these cells in TS cell medium can lead to the establishment of self-

renewing TS-like cells in some cases (Niwa et al., 2005; Lu et al., 2008; Nishioka et al., 2009). We examined the ability of *Gata3* to induce the formation of TS-like cells by overexpressing *Gata3ER*, which encodes a fusion between *Gata3* and the ligand-binding domain of the estrogen receptor (ER). *Gata3ER* was activated by addition of tamoxifen and, under TS cell derivation conditions, TS-like colonies were detected among cultures within 6 days (Fig. 1C; 4/5 lines examined), but not in control ES cells grown under the same conditions (Fig. 1E). However, endoderm-like cells were also present in all *Gata3* cultures (Fig. 1C'), and these were not present in ES cells overexpressing *Cdx2* (Fig. 1D). Continued passage of *Cdx2*-overexpressing ES cells led to the establishment of TS-like cell lines (4/5 lines examined). TS-like colonies were continuously detected among *Gata3*-overexpressing cells. However, cultures were consistently heterogeneous, and the TS cell phenotype could not be enriched under the conditions examined (5/5 lines examined). Thus, although both genes appear capable of inducing trophoblast differentiation in ES cells, only *Cdx2* produced stable TS cell lines when overexpressed in ES cells.

We next compared the ability of *Gata3* and *Cdx2* to induce trophoblast at the gene expression level, comparing global gene expression profiles of ES cells overexpressing either gene. To restrict our analysis to trophoblast-specific genes, we began by defining a set of ~1800 core trophoblast genes, using TS cells as a reference (Fig. 2A; see Table S1 in the supplementary material; see Materials and methods). We then used this set to filter data sets from *Cdx2*-expressing and *Gata3*-expressing ES cell lines. This led to lists of genes induced by *Gata3* (449/1794 core trophoblast genes) or *Cdx2* (326/1794 core trophoblast genes) (see Table S2 in the supplementary material). *Gata3* was therefore capable of inducing more trophoblast genes than *Cdx2*.

To examine qualitative similarities and differences in trophoblast genes induced by the overexpression of these two genes, we examined the overlap between the two lists. This revealed trophoblast genes induced by *Gata3* (225 genes) or *Cdx2* (102 genes) alone, as well as common genes induced by either factor (224 genes) (Fig. 2B; see Table S2 in the supplementary material). Thus, although around half of the trophoblast genes induced by *Gata3* were also induced by *Cdx2*, each factor also induced the expression of a unique set of trophoblast genes. These differences were validated by qPCR for a subset of the genes (see Fig. S2 in the supplementary material). This analysis suggested that *Gata3* expression is induced by ectopic *Cdx2*, although *Gata3* targets were not in turn detected in the *Cdx2*-overexpression array. This disparity could be due to differences in the levels of overexpressed *Gata3* in these two conditions. Alternatively, *Cdx2* might directly or indirectly repress the expression of a subset of *Gata3* target genes. This possibility is further addressed below.

These observations predict that *Gata3* and *Cdx2* will have both shared and distinct roles during trophoblast development. Among the genes induced by either factor, an examination of phenotypes for those that have been knocked out (Fig. 2C) revealed defects in multiple trophoblast subtypes and at multiple developmental stages (see Table S3 in the supplementary material). No single trophoblast phenotype was predominant in any of the lists, suggesting that *Cdx2* and *Gata3* targets are likely to play diverse, and possibly overlapping, roles in trophoblast development.

This analysis, which was designed to focus on the trophoblast roles of these genes, excluded genes that were not included among the core trophoblast gene list. We noted 347 'non-trophoblast' genes induced by *Gata3* and 72 induced by *Cdx2* (see Table S4A,B in the supplementary material). Interestingly, among the genes induced by

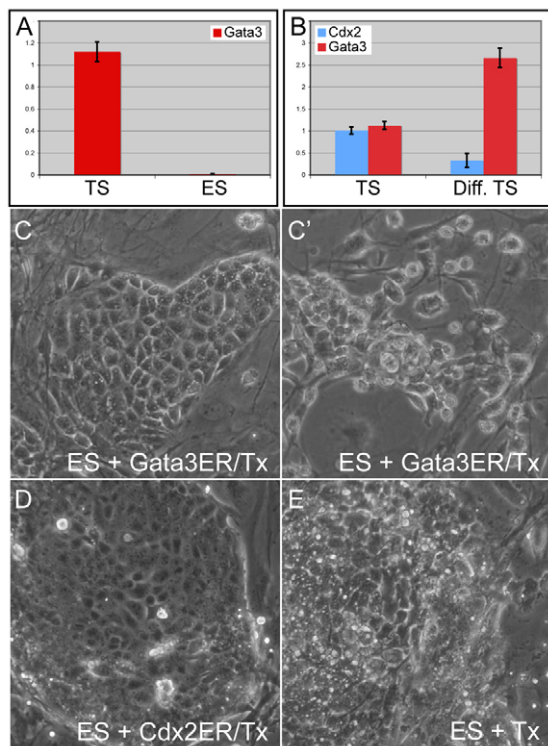

**Fig. 1. *Gata3* is sufficient to induce trophoblast morphology in mouse ES cells.** (A) qPCR analysis of *Gata3* levels in embryonic stem (ES) and trophoblast stem (TS) cells. For this and all subsequent qPCR analyses, expression levels have been normalized to those in TS cells. Error bars, variation in technical replicates. (B) qPCR analysis of *Gata3* levels in self-renewing and TS cells differentiated for 6 days. (C) TS-like morphology resulting from overexpression of *Gata3* in ES cells for 6 days and subsequent passage on feeders. (C') Endoderm-like morphology present among ES cells overexpressing *Gata3*. (D) TS-like cells derived from ES cells overexpressing *Cdx2*. (E) Control ES cells treated in parallel. Tx, tamoxifen.



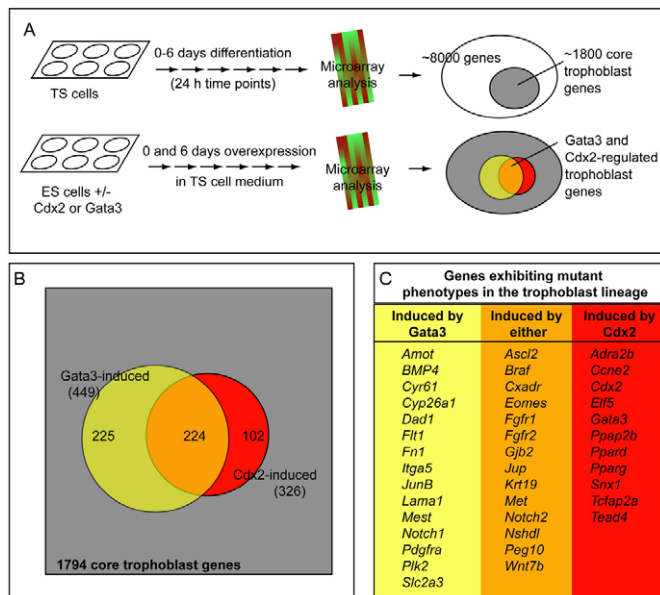

**Fig. 2. Gata3 is sufficient to induce trophoblast gene expression in ES cells.** (A) Data mining strategy for examining trophoblast gene expression in ES cells overexpressing *Cdx2* or *Gata3*. TS cells were differentiated for 6 days, and samples harvested daily during this period to generate a 6-day differentiation profile. Around 1800/8000 genes (core trophoblast genes, gray) exhibited a 2-fold or greater change in absolute expression level over the course of the experiment and were retained as likely to be important for trophoblast development. Changes in the expression of core trophoblast genes were then examined in ES cells overexpressing *Gata3* or *Cdx2* for 0 and 6 days. Genes exhibiting a greater than 2-fold increase in expression level in at least one of the cell lines examined were retained. (B) Venn diagram showing overlap between the lists of core trophoblast genes (gray) exhibiting a 2-fold or greater enrichment in lists from *Gata3*-expressing (yellow) or *Cdx2*-expressing (red) cells. The number of genes within each subset is indicated. (C) Subset of genes represented in B with Mouse Genome Informatics (MGI)-archived mutant phenotypes that affect the trophoblast lineage.

*Gata3* were many known endodermal genes, including *Foxa2*, *Sox17* and *Sox7*. Thus, both *Cdx2* and *Gata3* are capable of inducing non-trophoblast targets in ES cells, consistent with the diverse developmental roles played by these genes and the plasticity of ES cells to respond to inductive cues.

### Gata3 exhibits both Cdx2-dependent and -independent induction of trophoblast gene expression

In ES cells, downregulation of *Oct4* leads to upregulation of *Cdx2* and the adoption of trophoblast fate (Niwa et al., 2000), raising the possibility that *Gata3* overexpression could induce trophoblast gene expression by simply altering *Oct4/Cdx2* levels. To address this possibility, we examined trophoblast gene expression following *Gata3* overexpression in the dKO23-5 ES cell line that is *Cdx2* null and expresses *Oct4* constitutively (Niwa et al., 2005). *Gata3* overexpression in dKO23-5 cells led to changes in cell morphology, and TS cell lines could not be established in this genetic background, as expected (5/5 lines examined). A microarray comparison of differences in the induction of trophoblast genes following overexpression of *Gata3* in wild-type and dKO23-5 ES cells

revealed that *Gata3* was still able to induce a large number of core trophoblast genes (284/1794, compared with 449/1794 in wild-type cells). *Gata3* is therefore sufficient to induce trophoblast gene expression in a *Cdx2*-independent manner.

However, the expression of many trophoblast genes was lost in this genetic background. Examining the intersection between the lists of core trophoblast genes induced by *Gata3* in either wild-type or dKO23-5 cells (Fig. 3A) revealed that the expression of 172/449 *Gata3* targets was unchanged, whereas 277/449 targets were no longer induced by *Gata3* in dKO23-5 cells. Therefore, the expression of some *Gata3* targets relied on the *Oct4/Cdx2* pathway, whereas the expression of others, such as *Eomes* and *Ascl2*, did not (Fig. 3B). The genes that were dependent on *Cdx2*, however, did not necessarily overlap with those induced by *Cdx2*, suggesting differences in the necessity and sufficiency of *Cdx2* for trophoblast gene expression.

This analysis also identified 112 genes that were induced by *Gata3* in dKO23-5 and not wild-type ES cells (Fig. 3A; see Table S5 in the supplementary material). This suggests that *Cdx2* might repress the *Gata3*-mediated induction of some trophoblast genes. Taken together, these observations suggest that *Gata3* can act via *Cdx2*, and in parallel to *Cdx2*, to induce trophoblast gene expression. In addition, these observations suggest that *Gata3* might play a unique role in regulating trophoblast development independently of *Cdx2*.

### Gata3 is expressed in the trophoblast lineage in vivo

The findings that *Gata3* is enriched in TS cells and is sufficient to induce trophoblast gene expression in ES cells suggested that *Gata3* might be expressed in the trophoblast during lineage establishment in vivo. We examined the expression of *Gata3* during trophoblast development at preimplantation stages (Fig. 4A-E). *Gata3* protein was detectable within the nuclei of the trophectoderm at the blastocyst stage, where it colocalized with *Cdx2* (Fig. 4D) ( $n=10$ ). In fact, *Gata3* colocalized with *Cdx2* at earlier preimplantation stages as well (Fig. 4A-C) ( $n=31$  embryos, 8- to 32-cell stages). Prior to becoming restricted to outside cells of the nascent trophectoderm, *Cdx2* is expressed in an unpatterned, mosaic manner beginning around the late 8-cell stage (Dietrich and Hiiragi, 2007; Ralston and Rossant, 2008). *Gata3* colocalized with *Cdx2* in nuclei on a cell-by-cell basis (723/730 cells) in embryos examined at the 8- to 32-cell stages (31 embryos). Among embryos in which *Gata3* and *Cdx2* expression did not perfectly correlate (5/31 embryos), *Gata3*-positive/*Cdx2*-negative and *Cdx2*-positive/*Gata3*-negative nuclei were detected at equivalent frequency (four and three nuclei, respectively). Thus, *Gata3* is coexpressed with *Cdx2* from the earliest developmental stages.

Since TS cells have also been derived from post-implantation embryos, around the time of gastrulation (Tanaka et al., 1998; Uy et al., 2002), we next examined *Gata3* expression around gastrula stages by in situ hybridization. *Gata3* expression was detected throughout the trophoblast lineage from embryonic day (E) 6.5 to 8.5 (Fig. 4E) ( $n=12$ ). This expression was consistent with previous reports (George et al., 1994) and included the extraembryonic ectoderm (EXE)/chorion and ectoplacental cone (EPC). However, we noted that higher levels of *Gata3* were detected in the EPC than in the EXE. By contrast, *Cdx2* levels appeared higher in the EXE than in the EPC (Fig. 4F). These differences were confirmed by qPCR, following microdissection of these regions (Fig. 4G). Since the EPC is thought to be more differentiated than the EXE, these observations suggest that *Gata3* levels increase during trophoblast differentiation.

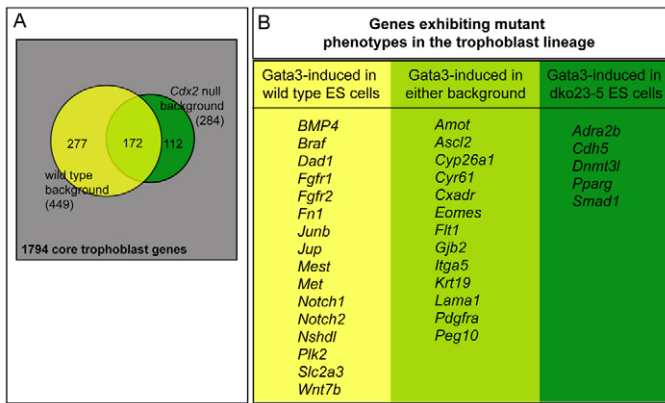

**Fig. 3. Gata3 induces trophoblast through Cdx2-dependent and -independent mechanisms.** (A) Venn diagram showing overlap between lists of core trophoblast genes (gray) upregulated by Gata3 in wild-type (yellow) or *Cdx2* null (green) ES cells, with the number of genes indicated. (B) Subset of genes represented in A with MGI-archived mutant phenotypes that affect the trophoblast lineage.

Notably, *Gata3* and *Cdx2* were also detected within the embryo proper around the gastrula stage and later, with *Gata3* in a restricted anterior region (Fig. 4E and data not shown), consistent with previous reports (Manaia et al., 2000), and *Cdx2* in posterior regions (Fig. 4F and data not shown) (Beck et al., 1995). This pattern is consistent with the proposal that both genes can also induce non-trophoblast targets in ES cells.

### Gata3 is sufficient to induce differentiation of TS cells

Increasing levels of *Gata3* during trophoblast differentiation, both in TS cells and in the post-implantation embryo, suggested that *Gata3* promotes differentiation. We therefore examined whether *Gata3* is sufficient to induce differentiation in TS cells. We introduced the *Gata3ER* fusion construct into a TS cell line and examined changes in morphology and gene expression following treatment with tamoxifen for 5 days. As in previous experiments, cells expressing the *Gata3ER* fusion protein were selected by drug resistance. Control TS cells treated with tamoxifen maintained a generally undifferentiated state (Fig. 5A). However, *Gata3*-overexpressing TS cells appeared largely differentiated, with numerous giant cells present throughout the culture (Fig. 5B), despite the continued presence of TS cell medium. Plasmid-electroporated cells treated with lower doses of tamoxifen did not appear differentiated, arguing that the differentiation effect was *Gata3* dependent. We therefore conclude that *Gata3* overexpression is sufficient to induce differentiation of TS cells. This proposal was confirmed by an examination of TS cell and giant cell markers by qPCR (Fig. 5C).

### Common mechanisms of regulation of Cdx2 and Gata3 in the blastocyst

Coexpression of *Cdx2* and *Gata3* at the blastocyst stage led us to investigate whether these genes are regulated by a common mechanism in vivo. The transcription factor *Tead4* is required for *Cdx2* expression prior to the blastocyst stage (Yagi et al., 2007; Nishioka et al., 2008). In *Tead4* mutants, *Cdx2* is initially detected around the 16-cell stage (Nishioka et al., 2008), but this expression is lost and embryos die prior to blastocyst formation around the 32-cell

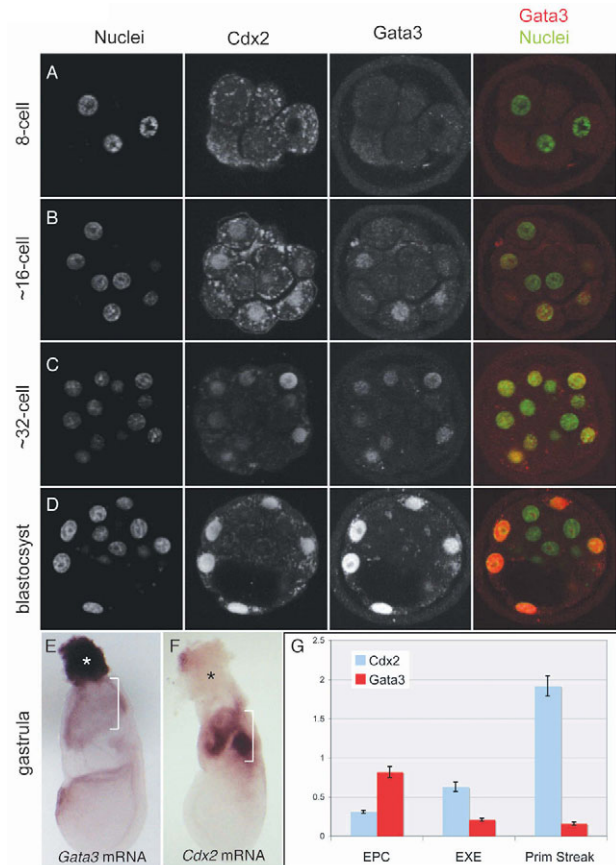

**Fig. 4. Gata3 is expressed in the trophoblast lineage.**

(A-D) Representative confocal sections of preimplantation mouse embryos (stages indicated) showing simultaneous localization of *Cdx2* and *Gata3*. Merged images show *Gata3* and nuclei, emphasizing the localization of *Gata3* in nuclei in outside cells of the embryo (yellow), as previously shown for *Cdx2*. Since the expression levels of *Cdx2* and *Gata3* appear to increase steadily during preimplantation stages, confocal settings were changed between embryos so as to optimize the signal-to-noise ratio for each developmental stage examined. Note that neither *Cdx2* nor *Gata3* is detectable in early 8-cell embryos (shown), but they become detectable during the 8- to 16-cell transition. Background fluorescence from the zona pellucida (zp) can be detected in some channels. The apparent cytoplasmic staining detectable in the *Cdx2* channel is likely to be background as it is still present in *Cdx2* mutants stained with this polyclonal antibody (not shown). (E) Representative image of *Gata3* whole-mount in situ hybridization at ~E7.5. Note expression in the extraembryonic ectoderm (EXE) (bracket) and apparently higher levels of expression in the ectoplacental cone (EPC) (asterisk). (F) Representative image of *Cdx2* in situ hybridization at ~E7.5, with expression in EXE bracketed. (G) Quantification of *Cdx2* and *Gata3* levels in EXE, EPC and primitive streak regions from a pool of ten E7.5 embryos. Results are representative of experiments performed in triplicate.

stage (Yagi et al., 2007; Nishioka et al., 2008). We hypothesized that *Tead4* could play a role in the regulation of *Gata3* prior to blastocyst formation, and examined expression of *Gata3* in *Tead4* mutants at E3.5. Nuclear levels of *Gata3* were greatly reduced in *Tead4* mutants ( $n=5$ ) compared with non-mutants ( $n=17$ ) (Fig. 6A,B). Similar to *Cdx2*, however, low levels of *Gata3* could be detected in the nuclei of some cells (not shown), consistent with *Tead4* regulating the maintenance, rather than initiation, of *Gata3* expression.

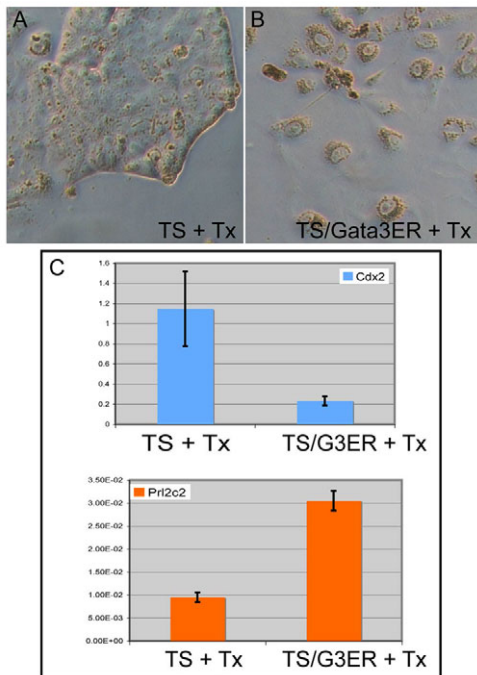

**Fig. 5. Gata3 is sufficient to induce differentiation in TS cells.**

(A) Control TS cells treated with tamoxifen (Tx) in TS cell medium for 5 days. (B) Giant cells have formed after 5 days of overexpression of Gata3ER in TS cells in the presence of tamoxifen and TS cell medium. (C) qPCR analysis of stem cell (*Cdx2*) and giant cell (*Pr12c2*) markers in control and Gata3-expressing TS cells. Results are representative of experiments performed in duplicate.

*Cdx2* expression is also lost in *Tead4* mutants (Yagi et al., 2007; Nishioka et al., 2008), suggesting that *Cdx2* could be required for *Gata3* expression during preimplantation. We therefore examined the requirement for *Cdx2* in *Gata3* expression in the trophectoderm by examining *Gata3* expression in *Cdx2* null embryos at E3.5. By confocal analysis, *Gata3* expression was unaffected by loss of *Cdx2* (Fig. 6C,D) ( $n=6$ ) at the blastocyst stage. This was validated at the mRNA level by qPCR (see Fig. S3 in the supplementary material). We conclude that *Cdx2* is not required for the expression of *Gata3* during trophectoderm formation, consistent with the similar timing of their expression at earlier stages. Rather, *Gata3* appears to be regulated by *Tead4* in parallel to *Cdx2* during blastocyst formation.

### Oct4 does not restrict trophectoderm gene expression during early blastocyst formation

We have shown that, like *Cdx2*, *Gata3* is initially expressed throughout the preimplantation embryo, suggesting that both genes become patterned by a process of repression within inside cells during blastocyst formation. *Oct4* is required for repression of *Cdx2* in ES cells (Niwa et al., 2000), consistent with a possible role for *Oct4* in repressing trophectoderm fates in the embryonic lineage. However, whether *Oct4* is required for repression of *Cdx2* in the inner cell mass during blastocyst formation has not been examined. Likewise, the role of *Oct4* in regulating *Gata3* expression during blastocyst formation remains unknown.

To examine the requirement for *Oct4* in repressing *Cdx2* and *Gata3* in vivo, we examined the expression of these markers in embryos lacking zygotic *Oct4* (Kehler et al., 2004). At the

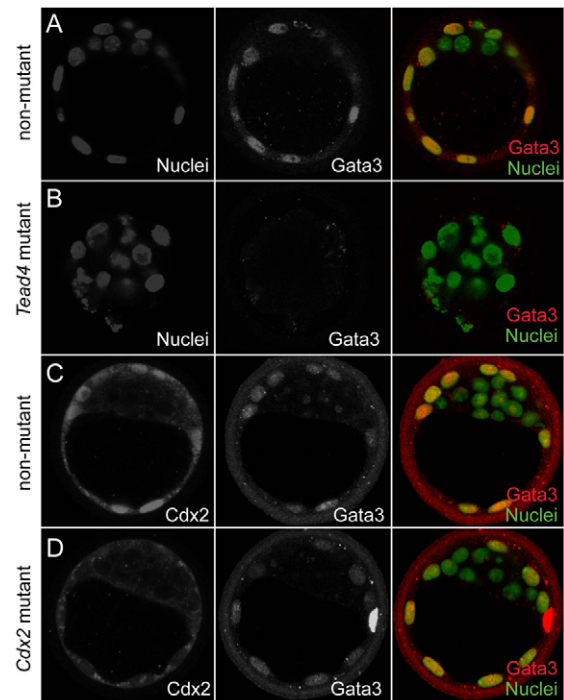

**Fig. 6. Parallel regulation of *Cdx2* and *Gata3* during blastocyst formation.**

(A) Confocal section of a non-mutant blastocyst from a *Tead4* heterozygous intercross, showing *Gata3* protein and nuclear stain. Merged red and green signals appear yellow. (B) Confocal section of a *Tead4* mutant at the same time point as in A, showing greatly reduced levels of *Gata3* in outside cells of the embryo. *Tead4* mutants contain roughly the same number of cells as non-mutants at this stage. (C) Confocal section of non-mutant blastocyst from a *Cdx2* heterozygous intercross, following immunofluorescent staining to detect *Cdx2* and *Gata3* proteins and nuclear stain. Note that the zona pellucida (zp) and polar body (pb) can also be detected in some channels/planes. (D) Confocal section of *Cdx2* mutant blastocyst showing *Cdx2* and *Gata3* protein within the trophectoderm. For each mutation examined, images were collected within a single confocal session and with identical settings.

blastocyst stage (E3.5), *Oct4* protein was undetectable in *Oct4* mutants (Fig. 7B) ( $n=3$ ), whereas *Oct4* was detected throughout the blastocyst at this stage in non-mutants (Fig. 7A). However, *Cdx2* and *Gata3* expression patterns were largely unaffected in *Oct4* mutants ( $n=4/5$  and  $n=2/2$ , respectively) (Fig. 7C). Although weak *Cdx2* expression was detected in the inner cell mass of one *Oct4* mutant embryo, *Cdx2* expression levels in the trophectoderm of this mutant embryo were also weaker than in non-mutant littermates (not shown). This pattern is normally observed in early blastocysts (Ralston and Rossant, 2008), suggesting that *Oct4* mutants can exhibit a slight developmental delay relative to non-mutant littermates. Indeed, this proposal is consistent with the previous observation that the trophectoderm marker keratin 8 (Krt8, detected by TROMA1 antibody) is detected in the inner cell mass of some, but not all, *Oct4* null embryos (Nichols et al., 1998). Since Krt8 is also expressed in the inner cell mass of early blastocysts (Ralston and Rossant, 2008), a developmental delay of *Oct4* mutants could explain this phenotype. Nonetheless, the majority of *Oct4* mutants exhibited the normal trophoblast-restricted expression of *Cdx2* at the blastocyst stage. These results therefore suggest that zygotic *Oct4*



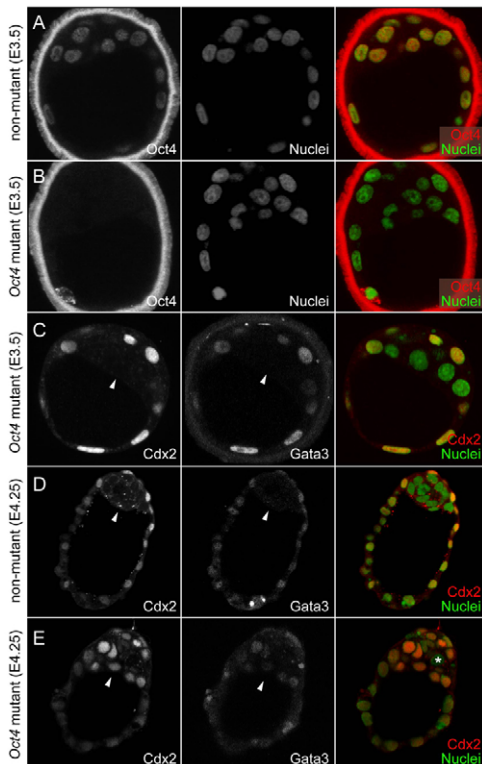

**Fig. 7. Oct4 maintains, but does not initiate, repression of trophoderm genes in the inner cell mass.** (A) Confocal section showing Oct4 protein and nuclear stain in a non-mutant blastocyst resulting from intercrossing *Oct4* heterozygous mice. (B) Confocal section showing nuclear stain and lack of detectable Oct4 protein in *Oct4* mutant blastocyst. (C) Confocal sections showing Gata3 and Cdx2 protein in *Oct4* mutant blastocysts. Note the absence of detectable Gata3 or Cdx2 in cells of the inner cell mass (arrowheads). (D) Confocal sections showing Gata3 and Cdx2 protein and nuclei in a non-mutant implanting blastocyst from an *Oct4* heterozygous intercross. Note the lack of detectable nuclear Gata3 and Cdx2 in epiblast and primitive endoderm cells (arrowheads). (E) Confocal sections showing nuclear Gata3 and Cdx2 in cells occupying epiblast and primitive endoderm regions (arrowheads), and a cell that lacks expression of either (asterisk). For each litter examined, images were collected within a single confocal session and with identical settings.

is not required for initial repression of trophoderm genes *Cdx2* or *Gata3*, indicating that other mechanisms lead to the restriction of both of these genes to the trophoderm.

To examine whether *Oct4* is required for maintaining restricted expression of trophoderm genes at later developmental stages, we attempted to examine the expression of *Cdx2* and *Gata3* in *Oct4* mutants after implantation, at ~E4.25. At this stage, *Oct4* mutants were extremely rare (1 mutant/27 non-mutant embryos), consistent with a requirement for *Oct4* for embryo survival. However, in a rare mutant recovered at this stage, *Cdx2* and *Gata3* were clearly upregulated in cells occupying epiblast and primitive endoderm territories (Fig. 7E). By contrast, both *Cdx2* and *Gata3* were always excluded from nuclei in epiblast and primitive endoderm populations in non-mutants (Fig. 7D) ( $n=26$ ). Thus, *Oct4* is required for continued repression of *Cdx2* and *Gata3* in the late blastocyst, similar to its proposed role in repressing trophoblast fate in ES cells (Niwa et al., 2005). These observations indicate that the

establishment of trophoblast and embryonic lineages proceeds by a mechanism that is distinct from the program that regulates this lineage restriction in established ES cells or the epiblast.

## DISCUSSION

Here, we have used a combination of bioinformatic and functional genomic approaches to address fundamental questions about the first lineage restriction in the mouse. Specifically, what other factors act downstream of *Tead4*, are these sufficient or necessary to induce trophoblast fate, and are trophoblast factors themselves regulated in the embryo through mechanisms similar to those used in ES cells? Through genetic analyses performed in stem cells and in the mouse embryo, we provide evidence that *Gata3* acts downstream of *Tead4* and in parallel to *Cdx2*. A fundamental challenge in the field of stem cell biology is the paucity of truly trophoblast-specific markers. To overcome this challenge, we used TS cells as a reference tissue to define a set of core trophoblast genes. This enabled a deeper molecular comparison of trophoblast phenotypes resulting from the overexpression of *Gata3* or *Cdx2*, and provides a reference for future studies of this type.

We have shown that *Gata3* is sufficient to induce trophoblast genes in ES cells, consistent with another study (Nishiyama et al., 2009). Our analysis, however, revealed differences between *Gata3* and *Cdx2*. First, although expression of *Gata3* can induce trophoblast differentiation in ES cells, stable TS cell lines could not be maintained, unlike the situation with *Cdx2*. Rather, *Gata3* appears to act as a pro-differentiation factor in TS cells. Second, unlike *Cdx2*, *Gata3* is probably not required for the early lineage decision in the embryo. Whereas shRNA-mediated knockdown of *Gata3* leads to developmental delay during the morula-to-blastocyst transition (Home et al., 2009), *Gata3* null embryos survive until E10.5, whereupon they exhibit defects in the placenta and numerous fetal tissues (Ma et al., 1997). Thus, *Gata3* is both necessary and sufficient to promote trophoblast maturation, but is not sufficient to stabilize the stem cell state. Other studies have shown that other factors, including *Eomes*, *Elf5* and activated *Ras*, can also destabilize the pluripotent state of ES cells and drive trophoblast differentiation (Niwa et al., 2005; Lu et al., 2008; Ng et al., 2008; Nishiyama et al., 2009). Together, these observations suggest that there are multiple pathways capable of overriding the pluripotency program to induce trophoblast fate in ES cells.

Another intriguing difference between *Cdx2* and *Gata3* lies in their expression patterns at later stages of trophoblast development. Whereas *Cdx2* and *Gata3* were coexpressed in the EXE, *Gata3* was expressed at much higher levels within the EPC around the time of gastrulation. These observations suggest where *Cdx2*/*Gata3* targets might be expressed. For instance, common trophoblast targets would be expected to be expressed in the EXE. Consistent with this proposal, many genes involved in EXE development, such as *Fgfr2*, *Wnt7b* and *Bmp4* (Orr-Urtreger et al., 1993; Coucouvanis and Martin, 1999; Kemp et al., 2005), were induced by either *Cdx2* or *Gata3* overexpression in ES cells. In addition, EXE genes such as *Eomes* and *Ascl2* (Guillemot et al., 1994; Ciruna and Rossant, 1999; Russ et al., 2000) were induced by *Gata3* even in the absence of *Cdx2*, suggesting that *Gata3* can reinforce trophoblast fate through a *Cdx2*-independent mechanism. Intriguingly, *Gata3* was expressed at higher levels in the EPC than in the EXE, whereas *Cdx2* was not. This provides potential biological relevance for the set of trophoblast genes that were induced by *Gata3* only in the absence of *Cdx2*. Genes in this list included *Pparg* and *Dnmt3l*, loss of which lead to defects in trophoblast differentiation (Barak et al., 1999; Bourc'his et al., 2001). Thus, *Gata3* may promote a program of trophoblast

differentiation in the EPC where *Cdx2* expression is low or lacking. When overexpressed in TS cells, *Gata3* induced differentiation of the cells towards more differentiated cell fates, consistent with this role. In this way, *Gata3* could play a dual role, either promoting stem cell (EXE) fates or differentiation (EPC/giant cell fates) depending on the presence of other factors such as *Cdx2*. This proposal is consistent with evidence that *Gata3* is required for self-renewal of TS cells (Home et al., 2009). Moreover, *Gata2* has been proposed to promote self-renewal versus differentiation of hematopoietic progenitor cells in a level-dependent manner (Heyworth et al., 1999), arguing that *Gata3* might play a similar role in the trophoblast lineage.

We have also examined whether trophoblast factors are regulated in the embryo through mechanisms similar to those used in ES cells. In ES cells, *Oct4* normally represses trophoblast fate (Niwa et al., 2000). However, it has not been clear whether this relationship applies to the embryo. Since *Cdx2* and *Gata3* are initially expressed in both inside and outside cells, *Oct4* could repress the expression of these factors in inside cells during blastocyst formation. However, we show that *Oct4* is not involved in the repression of trophoblast fate in the embryo until around the time of implantation. Indeed, trophoblast cells can coexpress *Cdx2* and *Oct4* in a variety of contexts (Niwa et al., 2005; Strumpf et al., 2005; Lu et al., 2008; Ng et al., 2008), arguing that *Oct4* cannot be providing the initial patterning information along the inside/outside axis of the embryo. Rather, it was recently shown that the absence of Hippo signaling promotes *Cdx2* expression in outside cells during blastocyst formation (Nishioka et al., 2009). Thus, the maintenance of ES cell fate might reflect molecular interactions that are relevant to stages of development following the initial lineage decisions. This proposal could help to explain why *Cdx2* is not required for *Gata3*-mediated induction of *Eomes* in ES cells, even though *Cdx2* is initially required for expression of *Eomes* in the blastocyst (Ralston and Rossant, 2008). Studies conducted in ES cells may therefore be viewed as reflecting a lineage maintenance, rather than establishment, program.

Finally, our study suggests that culture conditions influence cell fate changes induced by transcription factor overexpression in ES cells. *Cdx2*, and not *Gata3*, was sufficient to induce the formation of TS-like cells from ES cells. However, the isolation of stable TS-like cells is only possible following continued passage in TS cell medium after an initial period of transient transcription factor overexpression, a process that takes at least 6 days. This is reminiscent of the process involved in reprogramming mature cell types to pluripotency (Takahashi and Yamanaka, 2006), and suggests that similar mechanisms might be involved in the generation of stable TS cell lines. Given that many non-trophoblast genes were induced by the overexpression of either *Cdx2* or *Gata3*, altering culture and selection conditions could therefore lead to an enrichment of different cell fate outcomes. For instance, the use of different cell culture medium, growth factors or small molecules might enable the enrichment of TS-like cells or endoderm from *Gata3*-expressing ES cells. Given that multiple pathways can override the pluripotent state, the manipulation of intrinsic and extrinsic factors could facilitate the selection of other lineage-specific stem cell types during this process.

#### Acknowledgements

We thank Owen Tamplin for in situ help; Jorge Cabezas, Colm Rea and Andres Nieto for animal help; Malgosia Kownacka, Jodi Garner and Alison Hirukawa for cell culture help; Dr Yojiro Yamanaka, Dr Michael A. Halbisen and members of the J.R. laboratory for helpful suggestions; Dr Alexey Tomilin for the *Oct4* mutant mice; and Brian De Veale, the laboratory of Dr Derek van der Kooy and

the Toronto Centre for Phenogenomics for help with mouse import. P.R.-G. was funded by a Canadian Institutes of Health Research Bisby Fellowship. J.S.D. was funded by the Biotechnology and Biological Sciences Research Council, UK. This work was funded by Grant #FRN13426 from the Canadian Institutes of Health Research.

#### Competing interests statement

The authors declare no competing financial interests.

#### Supplementary material

Supplementary material for this article is available at <http://dev.biologists.org/lookup/suppl/doi:10.1242/dev.038828/-/DC1>

#### References

- Barak, Y., Nelson, M. C., Ong, E. S., Jones, Y. Z., Ruiz-Lozano, P., Chien, K. R., Koder, A. and Evans, R. M. (1999). PPAR gamma is required for placental, cardiac, and adipose tissue development. *Mol. Cell* **4**, 585-595.
- Beck, F., Eriker, T., Russell, A. and James, R. (1995). Expression of *Cdx-2* in the mouse embryo and placenta: possible role in patterning of the extra-embryonic membranes. *Dev. Dyn.* **204**, 219-227.
- Beddington, R. S. and Robertson, E. J. (1989). An assessment of the developmental potential of embryonic stem cells in the midgestation mouse embryo. *Development* **105**, 733-737.
- Bourc'his, D., Xu, G. L., Lin, C. S., Bollman, B. and Bestor, T. H. (2001). Dnmt3L and the establishment of maternal genomic imprints. *Science* **294**, 2536-2539.
- Chawengsaksophak, K., James, R., Hammond, V. E., Kontgen, F. and Beck, F. (1997). Homeosis and intestinal tumours in *Cdx2* mutant mice. *Nature* **386**, 84-87.
- Ciruna, B. G. and Rossant, J. (1999). Expression of the T-box gene *Eomesodermin* during early mouse development. *Mech. Dev.* **81**, 199-203.
- Coucouvanis, E. and Martin, G. R. (1999). BMP signaling plays a role in visceral endoderm differentiation and cavitation in the early mouse embryo. *Development* **126**, 535-546.
- de Hoon, M. J., Imoto, S., Nolan, J. and Miyano, S. (2004). Open source clustering software. *Bioinformatics* **20**, 1453-1454.
- Dietrich, J. E. and Hiiragi, T. (2007). Stochastic patterning in the mouse pre-implantation embryo. *Development* **134**, 4219-4231.
- Evans, M. J. and Kaufman, M. H. (1981). Establishment in culture of pluripotential cells from mouse embryos. *Nature* **292**, 154-156.
- George, K. M., Leonard, M. W., Roth, M. E., Lieu, K. H., Kioussis, D., Grosfeld, F. and Engel, J. D. (1994). Embryonic expression and cloning of the murine *GATA-3* gene. *Development* **120**, 2673-2686.
- Guillemot, F., Nagy, A., Auerbach, A., Rossant, J. and Joyner, A. L. (1994). Essential role of *Mash-2* in extraembryonic development. *Nature* **371**, 333-336.
- Heyworth, C., Gale, K., Dexter, M., May, G. and Enver, T. (1999). A *GATA-2* estrogen receptor chimera functions as a ligand-dependent negative regulator of self-renewal. *Genes Dev.* **13**, 1847-1860.
- Home, P., Ray, S., Dutta, D., Bronshteyn, I., Larson, M. and Paul, S. (2009). *GATA3* is selectively expressed in the trophectoderm of peri-implantation embryo and directly regulates *Cdx2* gene expression. *J. Biol. Chem.* **284**, 28729-28737.
- Kehler, J., Tolkunova, E., Koschorz, B., Pesce, M., Gentile, L., Boiani, M., Lomeli, H., Nagy, A., McLaughlin, K. J., Scholer, H. R. et al. (2004). *Oct4* is required for primordial germ cell survival. *EMBO Rep.* **5**, 1078-1083.
- Kemp, C., Willems, E., Abdo, S., Lambiv, L. and Leyns, L. (2005). Expression of all Wnt genes and their secreted antagonists during mouse blastocyst and postimplantation development. *Dev. Dyn.* **233**, 1064-1075.
- Kunath, T., Arnaud, D., Uy, G. D., Okamoto, I., Chureau, C., Yamanaka, Y., Heard, E., Gardner, R. L., Avner, P. and Rossant, J. (2005). Imprinted X-inactivation in extra-embryonic endoderm cell lines from mouse blastocysts. *Development* **132**, 1649-1661.
- Lu, C. W., Yabuuchi, A., Chen, L., Viswanathan, S., Kim, K. and Daley, G. Q. (2008). Ras-MAPK signaling promotes trophectoderm formation from embryonic stem cells and mouse embryos. *Nat. Genet.* **40**, 921-926.
- Ma, G. T., Roth, M. E., Groskopf, J. C., Tsai, F. Y., Orkin, S. H., Grosfeld, F., Engel, J. D. and Linzer, D. I. (1997). *GATA-2* and *GATA-3* regulate trophoblast-specific gene expression in vivo. *Development* **124**, 907-914.
- Mania, A., Lemarchandel, V., Klaine, M., Max-Audit, I., Romeo, P., Dieterlen-Lievre, F. and Godin, I. (2000). *Lmo2* and *GATA-3* associated expression in intraembryonic hemogenic sites. *Development* **127**, 643-653.
- Martin, G. R. (1981). Isolation of a pluripotent cell line from early mouse embryos cultured in medium conditioned by teratocarcinoma stem cells. *Proc. Natl. Acad. Sci. USA* **78**, 7634-7638.
- Ng, R. K., Dean, W., Dawson, C., Lucifero, D., Madeja, Z., Reik, W. and Hemberger, M. (2008). Epigenetic restriction of embryonic cell lineage fate by methylation of *Eif5*. *Nat. Cell Biol.* **10**, 1280-1290.
- Nichols, J., Zevnik, B., Anastasiadis, K., Niwa, H., Klewe-Nebenius, D., Chambers, I., Scholer, H. and Smith, A. (1998). Formation of pluripotent stem cells in the mammalian embryo depends on the POU transcription factor *Oct4*. *Cell* **95**, 379-391.



- Nishioka, N., Yamamoto, S., Kiyonari, H., Sato, H., Sawada, A., Ota, M., Nakao, K. and Sasaki, H. (2008). Tead4 is required for specification of trophoblast in pre-implantation mouse embryos. *Mech. Dev.* **125**, 270-283.
- Nishioka, N., Inoue, K., Adachi, K., Kiyonari, H., Ota, M., Ralston, A., Yabuta, N., Hirahara, S., Stephenson, R. O., Ogonuki, N. et al. (2009). The hippo signaling pathway components lats and Yap pattern Tead4 activity to distinguish mouse trophoblast from inner cell mass. *Dev. Cell* **16**, 398-410.
- Nishiyama, A., Xin, L., Sharov, A. A., Thomas, M., Mowrer, G., Meyers, E., Piao, Y., Mehta, S., Yee, S., Nakatake, Y. et al. (2009). Uncovering early response of gene regulatory networks in ESCs by systematic induction of transcription factors. *Cell Stem Cell* **5**, 420-433.
- Niwa, H., Miyazaki, J. and Smith, A. G. (2000). Quantitative expression of Oct-3/4 defines differentiation, dedifferentiation or self-renewal of ES cells. *Nat. Genet.* **24**, 372-326.
- Niwa, H., Toyooka, Y., Shimosato, D., Strumpf, D., Takahashi, K., Yagi, R. and Rossant, J. (2005). Interaction between Oct3/4 and Cdx2 determines trophoblast differentiation. *Cell* **123**, 917-929.
- Orr-Urtreger, A., Bedford, M. T., Burakova, T., Arman, E., Zimmer, Y., Yayon, A., Givol, D. and Lonai, P. (1993). Developmental localization of the splicing alternatives of fibroblast growth factor receptor-2 (FGFR2). *Dev. Biol.* **158**, 475-486.
- Ralston, A. and Rossant, J. (2008). Cdx2 acts downstream of cell polarization to cell-autonomously promote trophoblast fate in the early mouse embryo. *Dev. Biol.* **313**, 614-629.
- Ray, S., Dutta, D., Rumi, M. A., Kent, L. N., Soares, M. J. and Paul, S. (2009). Context-dependent function of regulatory elements and a switch in chromatin occupancy between GATA3 and GATA2 regulate Gata2 transcription during trophoblast differentiation. *J. Biol. Chem.* **284**, 4978-4988.
- Russ, A. P., Wattler, S., Colledge, W. H., Aparicio, S. A., Carlton, M. B., Pearce, J. J., Barton, S. C., Surani, M. A., Ryan, K., Nehls, M. C. et al. (2000). Eomesodermin is required for mouse trophoblast development and mesoderm formation. *Nature* **404**, 95-99.
- Strumpf, D., Mao, C. A., Yamanaka, Y., Ralston, A., Chawengsaksophak, K., Beck, F. and Rossant, J. (2005). Cdx2 is required for correct cell fate specification and differentiation of trophoblast in the mouse blastocyst. *Development* **132**, 2093-2102.
- Takahashi, K. and Yamanaka, S. (2006). Induction of pluripotent stem cells from mouse embryonic and adult fibroblast cultures by defined factors. *Cell* **126**, 663-676.
- Tanaka, S., Kunath, T., Hadjantonakis, A. K., Nagy, A. and Rossant, J. (1998). Promotion of trophoblast stem cell proliferation by FGF4. *Science* **282**, 2072-2075.
- Uy, G. D., Downs, K. M. and Gardner, R. L. (2002). Inhibition of trophoblast stem cell potential in chorionic ectoderm coincides with occlusion of the ectoplacental cavity in the mouse. *Development* **129**, 3913-3924.
- Yagi, R., Kohn, M. J., Karavanova, I., Kaneko, K. J., Vullhorst, D., DePamphilis, M. L. and Buonanno, A. (2007). Transcription factor TEAD4 specifies the trophoblast lineage at the beginning of mammalian development. *Development* **134**, 3827-3836.
- Yamanaka, Y., Tamplin, O. J., Beckers, A., Gossler, A. and Rossant, J. (2007). Live imaging and genetic analysis of mouse notochord formation reveals regional morphogenetic mechanisms. *Dev. Cell* **13**, 884-896.
